# Supplementary material for: Protective effect of sialyllactose on the intestinal epithelium in weaned pigs upon enterotoxigenic Escherichia coli challenge
Source: Royal Society of Chemistry journal article supplement (doi:10.1039/d2fo02066a), 2022-01-01
Supplement: d2fo02066a1.pdf [file d2fo02066a1.pdf]

Table S1. Sequences of primers for genes and intestinal bacteria

| Gene            | Primer sequence (5' –3')  | Annealing temperature (°C) | Product size (bp) |
|-----------------|---------------------------|----------------------------|-------------------|
| <i>β-Actin</i>  | F: TGGAACGGTGAAGGTGACAGC  | 60                         | 177               |
|                 | R: GCTTTTGGGAAGGCAGGGACT  |                            |                   |
| <i>Bcl-2</i>    | F: ATGTGTGTGGAGAGCGTCAA   | 60                         | 142               |
|                 | R: GCCCATAACAGCTCCACAAAG  |                            |                   |
| <i>Caspase3</i> | F:GGGATTGAGACGGACAGTGG    | 60                         | 136               |
|                 | R:TGAACCAGGATCCGTCCTTTG   |                            |                   |
| <i>Caspase9</i> | F:AATGCCGATTTGGCTTACGT    | 60                         | 195               |
|                 | R: CATTGCTTGGCAGTCAGGTT   |                            |                   |
| <i>HO-1</i>     | F:CGCTCCCGAATGAACAC       | 60                         | 112               |
|                 | R:GCTCCTGCACCTCCTC        |                            |                   |
| <i>IL-1β</i>    | F: GTGATGCCAACGTGCAGTCT   | 60                         | 97                |
|                 | R: AGGTGGAGAGCCTTCAGCAT   |                            |                   |
| <i>IL-6</i>     | F: TGGCTACTGCCTTCCCTACC   | 60                         | 153               |
|                 | R: CACACATCTCCTTTCTCATTGC |                            |                   |
| <i>KEAP-1</i>   | F:ACGACGTGGAGACAGAAACGT   | 60                         | 56                |
|                 | R:GCTTCGCCGATGCTTCA       |                            |                   |
| <i>MyD88</i>    | F: CCATTCGAGATGACCCCTG    | 60                         | 183               |
|                 | R: TAGCAATGGACCAGACGCAG   |                            |                   |
| <i>NFκB</i>     | F: GTGTGTAAAGAAGCGGGACCT  | 60                         | 139               |
|                 | R: CACTGTCACCTGGAAGCAGAG  |                            |                   |
| <i>Nrf-2</i>    | F:GCCCCTGGAAGCGTTAAAC     | 60                         | 67                |
|                 | R:GGACTGTATCCCCAGAAGGTTGT |                            |                   |
| <i>TNF-α</i>    | F: GCATCGCCGTCTCCTACCAG   | 60                         | 173               |
|                 | R: GGGCAGGTTGATCTCGGCAC   |                            |                   |
| <i>TLR4</i>     | F: TTACAGAAGCTGGTTGCCGT   | 60                         | 152               |
|                 | R: TCCAGGTTGGGCAGGTTAGA   |                            |                   |
| Total bacteria  | F: ACTCCTACGGGAGGCAGCAG   | 60                         | 200               |
|                 | R: ATTACCGCGGCTGCTGG      |                            |                   |

F: CATGCCGCGTGTATGAAGAA

*Escherichia coli*

R: CGGGTAACGTCAATGAGCAAA

60

96

P: AGGTATTAAC TTTACTCCCTTCCTC

---

*BCL-2*: B-cell lymphoma-2; *caspase-3*: cysteinyl aspartate-specific proteinase-3; *caspase-9*: cysteinyl aspartate-specific proteinase-9; *HO-1*: heme oxygenase-1; *IL-1 $\beta$* : Interleukin1- $\beta$ ; *IL-6*: Interleukin-6; *KEAP-1*: kelch like ECH associated protein 1; *MyD88*: myeloid differentiation factor 88; *NF- $\kappa$ B*: nuclear factor kappa-light-chain-enhancer of activated B cells; *Nrf-2*: nuclear factor erythroid-2 related factor 2; *TLR4*: toll-like receptor 4; *TNF- $\alpha$* : Tumor necrosis factor- $\alpha$ ;
